# Supplementary material for: A linear programming approach for estimating the structure of a sparse linear genetic network from transcript profiling data
Source: Springer Nature journal article supplement (doi:10.1186/1748-7188-4-5), 2009-02-24
Supplement: Additional file 3 [file 1748-7188-4-5-s3.pdf]

## Appendix I

Table 1: Information about the proteins encoded by the genes depicted in Figure 3. For each gene, the *Saccharomyces* Genome Database (SGD) description, Gene Ontology (GO) terms and InterPro protein domains are listed (when available).

| Name                | Description                                                                                                                                                                                                                                                                                                                                                                                                                                                                                                                                                                                                                                                                                                                                                                                                                                                                                                                                                                                                                                                                                                                                                                                                                                |
|---------------------|--------------------------------------------------------------------------------------------------------------------------------------------------------------------------------------------------------------------------------------------------------------------------------------------------------------------------------------------------------------------------------------------------------------------------------------------------------------------------------------------------------------------------------------------------------------------------------------------------------------------------------------------------------------------------------------------------------------------------------------------------------------------------------------------------------------------------------------------------------------------------------------------------------------------------------------------------------------------------------------------------------------------------------------------------------------------------------------------------------------------------------------------------------------------------------------------------------------------------------------------|
| RAD54<br>(YGL163C)  | <b>SGD</b> DNA-dependent ATPase, stimulates strand exchange by modifying the topology of double-stranded DNA; involved in the recombinational repair of double-strand breaks in DNA during vegetative growth and meiosis; member of the SWI/SNF family. <b>GO</b> DNA topoisomerase activity, DNA-dependent ATPase activity, ATP binding, DNA binding, helicase activity, hydrolase activity, nucleic acid binding, nucleotide binding. chromatin remodeling, heteroduplex formation, telomerase-independent telomere maintenance, double-strand break repair via synthesis-dependent strand annealing, DNA repair, response to DNA damage stimulus. Nucleus. <b>Interpro</b> DEAD/DEAH box helicase, N-terminal; The DEAD box helicases are involved in various aspects of RNA metabolism, including nuclear transcription, pre-mRNA splicing, ribosome biogenesis, nucleocytoplasmic transport, translation, RNA decay and organellar gene expression. Helicase, C-terminal; SNF2-related; SNF2 functions as the ATPase component of the SNF2/SWI multisubunit complex, which utilises energy derived from ATP hydrolysis to disrupt histone-DNA interactions, resulting in the increased accessibility of DNA to transcription factors. |
| DOA1<br>(YKL213C)   | <b>SGD</b> WD repeat protein required for ubiquitin-mediated protein degradation, forms complex with Cdc48p, plays a role in controlling cellular ubiquitin concentration; also promotes efficient NHEJ in postdiauxic/stationary phase. <b>GO</b> double-strand break repair via nonhomologous end-joining; ubiquitin-dependent protein catabolism. cytoplasm; nucleus. <b>Interpro</b> WD-40 repeats (also known as WD or beta-transducin repeats) are short ~ 40 amino acid motifs, often terminating in a Trp-Asp (W-D) dipeptide. The underlying common function of all WD-repeat proteins is coordinating multi-protein complex assemblies, where the repeating units serve as a rigid scaffold for protein interactions.                                                                                                                                                                                                                                                                                                                                                                                                                                                                                                            |
| RAD27<br>(Ykl113cp) | <b>SGD</b> 5' to 3' exonuclease, 5' flap endonuclease, required for Okazaki fragment processing and maturation as well as for long-patch base-excision repair; member of the <i>S. pombe</i> RAD2/FEN1 family. <b>GO</b> Nucleus. protein binding; 5'-flap endonuclease activity. DNA repair; DNA replication; DNA synthesis during DNA repair; double-strand break repair via non homologous end joining; replicative cell aging; telomere maintenance. <b>Interpro</b> The helix-hairpin-helix (HhH) motif is an around 20 amino acids domain present in prokaryotic and eukaryotic non-sequence-specific DNA binding proteins. These HhH motifs are observed in DNA repair enzymes and in DNA polymerases.                                                                                                                                                                                                                                                                                                                                                                                                                                                                                                                              |
| HHF1<br>(YBR009C)   | <b>SGD</b> One of two identical histone H4 proteins (see also HHF2); core histone required for chromatin assembly and chromosome function; contributes to telomeric silencing; N-terminal domain involved in maintaining genomic integrity. <b>GO</b> DNA binding. chromatin assembly or disassembly. nuclear nucleosome. <b>Interpro</b> Histone-fold/TFIID-TAF/NF-Y; Histone core; Histone H4.                                                                                                                                                                                                                                                                                                                                                                                                                                                                                                                                                                                                                                                                                                                                                                                                                                           |
| RPB5<br>(YBR154C)   | <b>SGD</b> RNA polymerase subunit ABC27, common to RNA polymerases I, II, and III; contacts DNA and affects transactivation. <b>GO</b> DNA-directed RNA polymerase activity. transcription from RNA polymerase I promoter; transcription from RNA polymerase II promoter; transcription from RNA polymerase III promoter. DNA-directed RNA polymerase I complex; DNA-directed RNA polymerase II, core complex; DNA-directed RNA polymerase III complex. <b>Interpro</b> RNA polymerase Rpb5, N-terminal; RNA polymerase subunit, RPB5.                                                                                                                                                                                                                                                                                                                                                                                                                                                                                                                                                                                                                                                                                                     |
| POL12<br>(YBL035C)  | <b>SGD</b> B subunit of DNA polymerase $\alpha$ -primase complex, required for initiation of DNA replication during mitotic and premeiotic DNA synthesis; also functions in telomere capping and length regulation. <b>GO</b> $\alpha$ DNA polymerase activity. DNA replication initiation; DNA replication, synthesis of RNA primer; lagging strand elongation. $\alpha$ DNA polymerase:primase complex; nuclear membrane; nucleus. <b>Interpro</b> DNA polymerase $\alpha$ subunit B.                                                                                                                                                                                                                                                                                                                                                                                                                                                                                                                                                                                                                                                                                                                                                    |

| Name                | Description                                                                                                                                                                                                                                                                                                                                                                                                                                                                                                                                                                                                                                                                                       |
|---------------------|---------------------------------------------------------------------------------------------------------------------------------------------------------------------------------------------------------------------------------------------------------------------------------------------------------------------------------------------------------------------------------------------------------------------------------------------------------------------------------------------------------------------------------------------------------------------------------------------------------------------------------------------------------------------------------------------------|
| GAT1<br>(Yf021wp)   | <b>SGD</b> Transcriptional activator of genes involved in nitrogen catabolite repression, member of the GATA family of DNA binding proteins; activity and localization regulated by nitrogen limitation and Ure2p <b>GO</b> cytosol; nucleus. specific RNA polymerase II transcription factor activity; transcriptional activator activity. positive regulation of transcription; regulation of nitrogen utilization; transcription initiation from RNA polymerase. <b>Interpro</b> A number of transcription factors (including erythroid-specific transcription factor and nitrogen regulatory proteins), specifically bind the DNA sequence (A/T)GATA(A/G) in the regulatory regions of genes. |
| RPL40A<br>(YIL148W) | <b>SGD</b> Fusion protein, identical to Rpl40Bp, that is cleaved to yield ubiquitin and a ribosomal protein of the large (60S) ribosomal subunit with similarity to rat L40; ubiquitin may facilitate assembly of the ribosomal protein into ribosomes. <b>GO</b> protein tag; structural constituent of ribosome. protein biosynthesis; protein ubiquitination; ribosome biogenesis and assembly. cytosolic large ribosomal subunit (sensu Eukaryota). <b>Interpro</b> Ubiquitin.                                                                                                                                                                                                                |
| CHS2<br>(YBR038W)   | <b>SGD</b> Chitin synthase II, requires activation from zymogenic form in order to catalyze the transfer of N-acetylglucosamine (GlcNAc) to chitin; required for the synthesis of chitin in the primary septum during cytokinesis. <b>GO</b> chitin synthase activity. cytokinesis. bud neck. <b>Interpro</b> Chitin synthase; Glycosyl transferase, family 2.                                                                                                                                                                                                                                                                                                                                    |
| PIG2<br>(Yil045wp)  | <b>SGD</b> Putative type-1 protein phosphatase targeting subunit that tethers Glc7p type-1 protein phosphatase to Gsy2p glycogen synthase. <b>GO</b> cytoplasm. protein phosphatase type 1 regulator activity. regulation of glycogen biosynthetic process. <b>Interpro</b> This family consists of several eukaryotic proteins that are thought to be involved in the regulation of glycogen metabolism.                                                                                                                                                                                                                                                                                         |
| CWP1<br>(YKL096W)   | <b>SGD</b> Cell wall mannoprotein, linked to a $\beta$ -1,3- and $\beta$ -1,6-glucan heteropolymer through a phosphodiester bond; involved in cell wall organization. <b>GO</b> structural constituent of cell wall. cell wall organization and biogenesis. cell wall. <b>Interpro</b> Yeast PIR protein repeat.                                                                                                                                                                                                                                                                                                                                                                                  |
| MNN1<br>(YER001W)   | <b>SGD</b> $\alpha$ -1,3-mannosyltransferase, integral membrane glycoprotein of the Golgi complex, required for addition of $\alpha$ 1,3-mannose linkages to N-linked and O-linked oligosaccharides, one of five <i>S. cerevisiae</i> proteins of the MNN1 family. <b>GO</b> $\alpha$ -1,3-mannosyltransferase activity. N-glycan processing; protein amino acid O-linked glycosylation. Golgi apparatus.                                                                                                                                                                                                                                                                                         |
| NCE102<br>(YPR149W) | <b>SGD</b> Protein of unknown function; contains transmembrane domains; involved in secretion of proteins that lack classical secretory signal sequences; component of the detergent-insoluble glycolipid-enriched complexes (DIGs). <b>GO</b> molecular function unknown. protein secretion. cytoplasm; endoplasmic reticulum; integral to membrane; mitochondrion.                                                                                                                                                                                                                                                                                                                              |
| DIP5<br>(YPL265W)   | <b>SGD</b> Dicarboxylic amino acid permease, mediates high-affinity and high-capacity transport of L-glutamate and L-aspartate; also a transporter for Gln, Asn, Ser, Ala, and Gly. <b>GO</b> amino acid permease activity; amino acid transporter activity. amino acid transport. plasma membrane. <b>Interpro</b> Amino acid/polyamine transporter I; Amino acid permease; Amino acid permease-associated region; Yeast amino acid permease.                                                                                                                                                                                                                                                    |
| CDC5<br>(YMR001C)   | <b>SGD</b> Polo-like kinase with similarity to <i>Xenopus</i> Plx1 and <i>S. pombe</i> Plo1p; found at bud neck, nucleus and SPBs; has multiple functions in mitosis and cytokinesis through phosphorylation of substrates; may be a Cdc28p substrate. <b>GO</b> protein serine/threonine kinase activity. DNA-dependent DNA replication; protein amino acid phosphorylation. Cellular Component: bud neck; nucleus; spindle pole. <b>Interpro</b> POLO box duplicated region; Protein kinase; Serine/threonine protein kinase, active site; Serine/threonine protein kinase.                                                                                                                     |

| Name                   | Description                                                                                                                                                                                                                                                                                                                                                                                                                                                                                                                                                                                                       |
|------------------------|-------------------------------------------------------------------------------------------------------------------------------------------------------------------------------------------------------------------------------------------------------------------------------------------------------------------------------------------------------------------------------------------------------------------------------------------------------------------------------------------------------------------------------------------------------------------------------------------------------------------|
| SR04/AXL2<br>(YIL140W) | <b>SGD</b> Integral plasma membrane protein required for axial budding in haploid cells, localizes to the incipient bud site and bud neck; glycosylated by Pmt4p; potential Cdc28p substrate. <b>GO</b> molecular function unknown. axial bud site selection; bud site selection. bud neck; integral to plasma membrane; septin ring. <b>Interpro</b> Dystroglycan-type cadherin-like; Putative Ig - This alignment represents the conserved core region of a ~ 90 residue repeat found in several haemagglutinins and other cell surface proteins.                                                               |
| HSL1<br>Ykl101w        | <b>SGD</b> <i>Nim1p</i> -related protein kinase that regulates the morphogenesis and septin checkpoints; associates with the assembled septin filament; required along with <i>Hsl7p</i> for bud neck recruitment, phosphorylation, and degradation of <i>Swe1p</i> <b>GO</b> bud neck; septin ring. protein kinase activity. cell morphogenesis checkpoint; G2/M transition of mitotic cell cycle; protein amino acid phosphorylation; septin checkpoint. <b>Interpro</b> Protein kinases catalyze the phospho-transfer reaction fundamental to most signalling and regulatory processes in the eukaryotic cell. |
| CLN2<br>(YPL256C)      | <b>SGD</b> G1 cyclin involved in regulation of the cell cycle; activates Cdc28p kinase to promote the G1 to S phase transition; late G1 specific expression depends on transcription factor complexes, MBF (Swi6p-Mbp1p) and SBF (Swi6p-Swi4p). <b>GO</b> cyclin-dependent protein kinase regulator activity. re-entry into mitotic cell cycle after pheromone arrest; regulation of cyclin dependent protein kinase activity. cytoplasm; nucleus. <b>Interpro</b> Cyclin, N-terminal; Cyclin.                                                                                                                    |
| SWE1<br>(YJL187C)      | <b>SGD</b> Protein kinase that regulates the G2/M transition by inhibition of Cdc28p kinase activity; localizes to the nucleus and to the daughter side of the mother-bud neck; homolog of <i>S. pombe</i> Wee1p; potential Cdc28p substrate. <b>GO</b> protein kinase activity. G2/M transition of mitotic cell cycle; G2/M transition size control checkpoint; cell morphogenesis checkpoint; regulation of cyclin dependent protein kinase activity; regulation of meiosis. bud neck; nucleus. <b>Interpro</b> Serine/threonine protein kinase, active site; Serine/threonine protein kinase.                  |
| BEM1<br>(YBR200W)      | <b>SGD</b> Protein containing SH3-domains, involved in establishing cell polarity and morphogenesis; functions as a scaffold protein for complexes that include Cdc24p, Ste5p, Ste20p, and Rsr1p. <b>GO</b> protein binding. cellular morphogenesis during conjugation with cellular fusion; establishment of cell polarity. bud neck; bud tip; incipient bud site; mating projection tip. <b>Interpro</b> Neutrophil cytosol factor 2; Octicosapeptide/Phox/Bem1p; Phox-like; SH3.                                                                                                                               |
| POL30<br>(YBR088C)     | <b>SGD</b> Proliferating cell nuclear antigen (PCNA), functions as the sliding clamp for DNA polymerase $\delta$ ; may function as a docking site for other proteins required for mitotic and meiotic chromosomal DNA replication and for DNA repair. <b>GO</b> DNA polymerase processivity factor activity. base-excision repair; lagging strand elongation; leading strand elongation; mismatch repair; mutagenesis; nucleotide-excision repair; postreplication repair. nucleus; replication fork. <b>Interpro</b> Proliferating cell nuclear antigen, PCNA.                                                   |
